# Supplementary material for: Impact of mutations in homologous recombination repair genes on treatment outcomes for metastatic castration resistant prostate cancer
Source: PubMed Central journal article supplement (PMC7526881; doi:10.1371/journal.pone.0239686), 2020-09-30
Supplement: pone.0239686.s003.pdf [file pone.0239686.s003.pdf]

**S1 Table. Specific genetic variants of every patient included in the HR cohort.**

| Study ID | Sequencing Assay     | Tissue Type<br>(1=primary,<br>2=metastatic,<br>3=ctDNA,<br>4=germline) | Affected HR Gene | Variant type                                                       | Germline alteration detected? | Bi-allelic mutation detected? | Notes                                                                                                                                                                                                                                                                                                                                                          |
|----------|----------------------|------------------------------------------------------------------------|------------------|--------------------------------------------------------------------|-------------------------------|-------------------------------|----------------------------------------------------------------------------------------------------------------------------------------------------------------------------------------------------------------------------------------------------------------------------------------------------------------------------------------------------------------|
| 1        | UW-OncoPlex          | 2                                                                      | FANCA            | Copy loss on portions of chromosome 16                             | N/A                           | No                            |                                                                                                                                                                                                                                                                                                                                                                |
| 2        | WEC                  | 1                                                                      | BRCA2            | Copy loss                                                          | No                            | Yes                           | Germline testing as part of WEC was negative.                                                                                                                                                                                                                                                                                                                  |
| 4        | UW-OncoPlex          | 3                                                                      | BRCA2            | chr13:g.32920928-32920952del, NM_000059.3:c.6938-12_6938-36del     | N/A                           | Yes                           | Patient had a 23bp somatic deletion mutation in BRCA2 within intron 12 near the exon 13 splice boundary in BRCA2 gene. The sample also tested positive for a VUS in CDK12 (p.D877Y,NM_015083.2:c.2629 G>T).                                                                                                                                                    |
| 9        | UW-OncoPlex          | 1                                                                      | MRE11A           | p.E506X, NM_005590.3:c.1516 G to T                                 | N/A                           | No                            |                                                                                                                                                                                                                                                                                                                                                                |
| 14       | UW-OncoPlex          | 2                                                                      | BRCA2            | Copy loss                                                          | No                            | Yes                           | Patient also had negative germline testing with BROCA.                                                                                                                                                                                                                                                                                                         |
| 20       | UW-OncoPlex          | 3                                                                      | BRCA2            | Copy loss                                                          | No                            | Yes                           | The patient had two ctDNA samples tested a year apart. The first sample was collected prior to the initiation of olaparib treatment. Both samples were positive for BRCA2 copy loss, although the loss was much less pronounced in the second study, suggesting the possibility of selection of a BRCA2-intact tumor clone under treatment selective pressure. |
| 24       | FoundationOne, Color | 1, 4                                                                   | BRCA2            | C.7558C>T                                                          | Yes                           | Yes                           | Germline testing with Color was positive for BRCA2 C.7558C>T mutation (this is also called p.Arg2520*, which is a known truncating pathogenic variant). Somatic testing with FoundationOne also showed Arg2520* mutation in BRCA2.                                                                                                                             |
| 25       | UW-OncoPlex          | 1                                                                      | CDK12            | NM_015083:c.2963+1 G to T, p.H194Kfs*133, NM_015083.1:c.576_609del | N/A                           | Yes                           |                                                                                                                                                                                                                                                                                                                                                                |
| 27       | UW-OncoPlex          | 2                                                                      | BRCA2            | Copy loss on a portion of chromosome 13                            | N/A                           | No                            |                                                                                                                                                                                                                                                                                                                                                                |
| 28       | UW-OncoPlex, WEC     | 1                                                                      | BRCA2            | p.V2969Cfs*7, NM_000059.3:c.8904delC                               | Yes                           | Yes                           | Patient had known germline BRCA2 mutation through WEC testing, confirmed to have somatic BRCA2 mutation through UW-OncoPlex testing.                                                                                                                                                                                                                           |

|    |               |   |       |                                                                                                |     |     |                                                                                                                                                                                                                                                                                                                                        |
|----|---------------|---|-------|------------------------------------------------------------------------------------------------|-----|-----|----------------------------------------------------------------------------------------------------------------------------------------------------------------------------------------------------------------------------------------------------------------------------------------------------------------------------------------|
| 31 | UW-OncoPlex   | 1 | BRCA2 | Copy loss                                                                                      | N/A | Yes |                                                                                                                                                                                                                                                                                                                                        |
| 33 | UW-OncoPlex   | 2 | BRCA2 | Copy loss on a portion of chromosome 13                                                        | N/A | No  |                                                                                                                                                                                                                                                                                                                                        |
| 34 | UW-OncoPlex   | 3 | CDK12 | p.E928Nfs*18, NM_015083.2:c.2778del, NM_015083.2:c.1046 G to T and NM_015083.2:c.1046+6 C to G | N/A | Yes |                                                                                                                                                                                                                                                                                                                                        |
| 36 | FoundationOne | 1 | ATM   | p.R3047*                                                                                       | N/A | Yes |                                                                                                                                                                                                                                                                                                                                        |
| 38 | UW-OncoPlex   | 2 | PALB2 | p.L345Sfs*2, NM_024675.3:c.1032_1033dup                                                        | N/A | Yes |                                                                                                                                                                                                                                                                                                                                        |
| 39 | UW-OncoPlex   | 1 | CHD1  | p.K1352Vfs*18, NM_001270.2:c.4054_4057del                                                      | N/A | No  |                                                                                                                                                                                                                                                                                                                                        |
| 43 | UW-OncoPlex   | 1 | BRCA2 | Copy loss of a portion of chromosome 13                                                        | N/A | N/A |                                                                                                                                                                                                                                                                                                                                        |
| 44 | Color         | 4 | BRCA2 | N/A                                                                                            | Yes | N/A | Information on variant was not available in patient records. This mutation was included because of the high penetrance and frequency of a second hit associated with BRCA2 mutations. Additionally, it enabled the patient to enroll in a PARP inhibitor trial.                                                                        |
| 48 | UW-OncoPlex   | 1 | CHD1  | Copy loss                                                                                      | N/A | Yes |                                                                                                                                                                                                                                                                                                                                        |
| 57 | FoundationOne | 1 | CDK12 | E647fs*8, R100fs*27                                                                            | N/A | Yes |                                                                                                                                                                                                                                                                                                                                        |
| 59 | UW-OncoPlex   | 1 | BRCA2 | p.Y1762X, NM_000059.3:c.5286T>G                                                                | N/A | Yes | The tissue also tested positive for rare variant in CDK12 (p.G923V, NM_015083.2:c.2768G>T) thought to represent benign variation.                                                                                                                                                                                                      |
| 63 | BRACAnalysis  | 4 | BRCA2 | 5057delTG                                                                                      | Yes | N/A | Patient did not have sequencing of tumor tissue. This mutation was included because of the high penetrance and frequency of a second hit associated with BRCA2 mutations.                                                                                                                                                              |
| 69 | UW-OncoPlex   | 1 | CHD1  | Copy loss                                                                                      | N/A | Yes |                                                                                                                                                                                                                                                                                                                                        |
| 70 | UW-OncoPlex   | 2 | ATM   | p.E2847_L2850del, NM_000051.3:c.8540_8551del                                                   | N/A | No  | The ATM mutation occurred within the critical PI3K domain, in which other mutations have been shown to be pathogenic. The sample also tested positive for copy losses on portions of chromosomes 11, 12, 13 (including single copy loss of BRCA2), 16 (including single copy loss of FANCA), 17 (including single copy loss of BRCA1). |

|    |                                         |         |                 |                                                                                                                                          |     |     |                                                                                                                                                                                                                                    |
|----|-----------------------------------------|---------|-----------------|------------------------------------------------------------------------------------------------------------------------------------------|-----|-----|------------------------------------------------------------------------------------------------------------------------------------------------------------------------------------------------------------------------------------|
| 71 | UW-OncoPlex                             | 1       | FANCA           | N/A                                                                                                                                      | N/A | N/A | Information on variant was not available in patient records. This mutation was included because it prompted treatment with Carboplatin due to the association between FANCA mutations and sensitivity to platinum chemotherapy.    |
| 72 | UW-OncoPlex                             | 1       | CDK12           | p.Y1329Cfs*4,<br>NM_015083.2:c.3986_3991delinsGTGG                                                                                       | N/A | N/A |                                                                                                                                                                                                                                    |
| 78 | Guardant360,<br>FoundationOne,<br>Color | 2, 3, 4 | BRCA2           | p.T2125fs*12                                                                                                                             | Yes | N/A | Patient had ctDNA testing with Guardant360, metastatic tumor testing with FoundationOne, and germline testing with Color that all confirmed the same frameshift mutation.                                                          |
| 79 | UW-OncoPlex                             | 3       | CHD1            | Copy loss                                                                                                                                | N/A | Yes |                                                                                                                                                                                                                                    |
| 81 | FoundationOne                           | 1       | ATM             | Loss of exons 9-52                                                                                                                       | No  | No  | Patient also had testing germline testing with Color that revealed VUS for MSH6 (c.33C>G phe11leu).                                                                                                                                |
| 82 | GeneTrails                              | 1       | FANCA           | Copy loss                                                                                                                                | N/A | N/A | The sample also tested positive for a VUS in ATR (p.I2164M)                                                                                                                                                                        |
| 84 | UW-OncoPlex                             | 1       | BRCA2           | p.Q2530X,<br>NM_000059.3:c.7588 C to T                                                                                                   | N/A | Yes | This mutation results in a premature stop codon at position 2530 in exon 15 of the BRCA2 protein.                                                                                                                                  |
| 86 | UW-OncoPlex                             | 2       | MRE11A          | p.L56W, NM_005590.3:c.167 T to G, p.K633Tfs*45,<br>NM_005590.3:c.1876_1895dup                                                            | N/A | Yes |                                                                                                                                                                                                                                    |
| 90 | UW-OncoPlex                             | 1       | BRCA2,<br>CHEK2 | BRCA2: p.Q3066X,<br>NM_000059.3:c.9196C to T,<br>chr13:32912206 to 32912334 del;<br><br>CHEK2: p.(T367Mfs*15),<br>NM_007194.3:c.1100delC | N/A | Yes | BRCA2: The first mutation results in a premature stop codon and has been previously described as an inherited mutation. The second deleterious BRCA2 mutation is an approximately 127bp deletion within exon 11 of the BRCA2 gene. |
