# Supplementary material for: Impact of mutations in homologous recombination repair genes on treatment outcomes for metastatic castration resistant prostate cancer
Source: PubMed Central journal article supplement (PMC7526881; doi:10.1371/journal.pone.0239686), 2020-09-30
Supplement: pone.0239686.s004.pdf [file pone.0239686.s004.pdf]

**S2 Table. Baseline lab comparisons at start of abiraterone based on HR status**

| <b>Measure</b>                           | <b>No HR (N=29)</b>     | <b>HR (N=19)</b>        | <b>P-value</b> |
|------------------------------------------|-------------------------|-------------------------|----------------|
| Albumin, median [IQR]                    | 4.00 [3.80, 4.20]       | 3.90 [3.68, 4.23]       | 0.6            |
| Alk Phos, median [IQR]                   | 104.00 [65.00, 201.00]  | 91.00 [75.50, 115.50]   | 0.4            |
| Hemoglobin, median [IQR]                 | 12.80 [11.60, 13.78]    | 12.10 [11.59, 13.30]    | 0.6            |
| LDH, median [IQR]                        | 165.00 [156.50, 173.75] | 140.00 [135.50, 208.50] | 0.9            |
| Neutrophil, median [IQR]                 | 4.21 [2.91, 4.58]       | 4.35 [2.44, 5.84]       | 0.5            |
| Platelets, median [IQR]                  | 205.00 [178.00, 252.00] | 215.00 [182.50, 242.50] | 0.9            |
| Testosterone, median [IQR]               | 0.40 [0.10, 1.00]       | 0.20 [0.05, 0.40]       | 0.3            |
| WBC, median [IQR]                        | 6.45 [5.41, 7.96]       | 6.32 [4.62, 7.87]       | 1.0            |
| ECOG, N (%)                              |                         |                         |                |
| - 0                                      | 16 (55.2)               | 11 (57.9)               |                |
| - 1                                      | 10 (34.5)               | 7 (36.8)                | 1.0            |
| - Unknown                                | 3 (10.3)                | 1 ( 5.3)                |                |
| Prior abiraterone or enzalutamide, N (%) | 4 (13.8)                | 2 (10.5)                | 1.0            |
