# Supplementary material for: Impact of mutations in homologous recombination repair genes on treatment outcomes for metastatic castration resistant prostate cancer
Source: PubMed Central journal article supplement (PMC7526881; doi:10.1371/journal.pone.0239686), 2020-09-30
Supplement: pone.0239686.s005.pdf [file pone.0239686.s005.pdf]

**S3 Table. Baseline lab comparisons at start of enzalutamide based on HR status.**

| <b>Measure</b>                           | <b>No HR (N=29)</b>     | <b>HR (N=24)</b>        | <b>P-value</b> |
|------------------------------------------|-------------------------|-------------------------|----------------|
| Albumin, median [IQR]                    | 4.00 [3.80, 4.20]       | 3.90 [3.68, 4.23]       | 0.6            |
| Alk Phos, median [IQR]                   | 80.00 [70.50, 122.50]   | 82.00 [65.00, 110.50]   | 0.7            |
| Hemoglobin, median [IQR]                 | 12.00 [11.15, 13.35]    | 12.55 [12.10, 13.92]    | 0.3            |
| LDH, median [IQR]                        | 155.00 [144.50, 170.50] | 159.00 [145.00, 169.00] | 0.9            |
| Neutrophil, median [IQR]                 | .33 [2.69, 5.00]        | 3.05 [2.65, 3.83]       | 0.5            |
| Platelets, median [IQR]                  | 195.00 [165.50, 217.50] | 208.50 [174.50, 262.50] | 0.5            |
| Testosterone, median [IQR]               | 0.08 [0.05, 0.30]       | 0.20 [0.09, 0.20]       | 1.0            |
| WBC, median [IQR]                        | 5.20 [4.62, 7.32]       | 5.33 [4.73, 6.29]       | 0.9            |
| ECOG, N (%)                              |                         |                         |                |
| - 0                                      | 14 (48.3)               | 13 (54.2)               |                |
| - 1                                      | 7 (24.1)                | 5 (20.8)                |                |
| - 2                                      | 2 (6.9)                 | 4 (16.7)                | 0.5            |
| - 3                                      | 3 (10.3)                | 0 (0.0)                 |                |
| - Unknown                                | 3 (10.3)                | 2 (8.3)                 |                |
| Prior abiraterone or enzalutamide, N (%) | 17 (58.6)               | 11 (45.8)               | 0.4            |
