# Supplementary material for: Impact of mutations in homologous recombination repair genes on treatment outcomes for metastatic castration resistant prostate cancer
Source: PubMed Central journal article supplement (PMC7526881; doi:10.1371/journal.pone.0239686), 2020-09-30
Supplement: pone.0239686.s006.pdf [file pone.0239686.s006.pdf]

**S4 Table. Baseline lab comparisons at start of docetaxel based on HR status.**

| <b>Measure</b>                        | <b>No HR (N=25)</b>     | <b>HR (N=11)</b>        | <b>P-value</b> |
|---------------------------------------|-------------------------|-------------------------|----------------|
| Albumin, median [IQR]                 | 4.00 [3.75, 4.20]       | 3.95 [3.73, 4.15]       | 0.8            |
| Alk Phos, median [IQR]                | 101.50 [64.00, 253.25]  | 89.50 [65.75, 93.75]    | 0.3            |
| Hemoglobin, median [IQR]              | 12.20 [10.07, 12.95]    | 13.10 [10.90, 13.55]    | 0.3            |
| LDH, median [IQR]                     | 228.00 [215.00, 364.00] | 203.00 [177.50, 228.50] | 0.5            |
| Neutrophil, median [IQR]              | 3.84 [3.04, 5.71]       | 4.10 [2.51, 5.33]       | 0.7            |
| Platelets, median [IQR]               | 243.50 [167.25, 276.00] | 220.00 [200.00, 266.50] | 0.8            |
| Testosterone, median [IQR]            | 0.05 [0.05, 0.09]       | N/A                     | N/A            |
| WBC, median [IQR]                     | 5.48 [4.21, 7.10]       | 6.40 [4.98, 7.07]       | 0.4            |
| ECOG, N (%)                           |                         |                         |                |
| - 0                                   | 5 (20.0)                | 5 (45.5)                |                |
| - 1                                   | 14 (56.0)               | 2 (18.2)                |                |
| - 2                                   | 4 (16.0)                | 2 (18.2)                | 0.17           |
| - 3                                   | 1 (4.0)                 | 1 (9.1)                 |                |
| - Unknown                             | 1 (4.0)                 | 1 (9.1)                 |                |
| Prior docetaxel or cabazitaxel, N (%) | 2 (8.0)                 | 0 (0.0)                 | 1.0            |
