# Supplementary material for: Impact of mutations in homologous recombination repair genes on treatment outcomes for metastatic castration resistant prostate cancer
Source: PubMed Central journal article supplement (PMC7526881; doi:10.1371/journal.pone.0239686), 2020-09-30
Supplement: pone.0239686.s007.pdf [file pone.0239686.s007.pdf]

**S5 Table. Baseline lab comparisons at start of cabazitaxel based on HR status.**

| <b>Measure</b>                        | <b>No HR (N=12)</b>     | <b>HR (N=5)</b>         | <b>P-value</b> |
|---------------------------------------|-------------------------|-------------------------|----------------|
| Albumin, median [IQR]                 | 3.80 [3.77, 3.92]       | 3.30 [3.20, 3.40]       | 0.09           |
| Alk Phos, median [IQR]                | 69.00 [61.75, 96.50]    | 86.00 [79.00, 125.00]   | 0.4            |
| Hemoglobin, median [IQR]              | 11.20 [10.45, 11.93]    | 12.00 [9.90, 12.60]     | 0.6            |
| LDH, median [IQR]                     | 217.50 [213.25, 221.75] | 263.00 [234.50, 516.50] | 0.6            |
| Neutrophil, median [IQR]              | 4.50 [3.73, 6.27]       | 3.54 [2.45, 4.67]       | 0.2            |
| Platelets, median [IQR]               | 200.50 [165.75, 240.25] | 88.00 [79.00, 109.00]   | 0.03           |
| Testosterone, median [IQR]            | 0.05 [0.05, 0.05]       | 0.05 [0.05, 0.05]       | N/A            |
| WBC, median [IQR]                     | 5.95 [4.63, 8.19]       | 6.03 [3.80, 6.19]       | 0.5            |
| ECOG, N (%)                           |                         |                         |                |
| - 0                                   | 1 ( 8.3)                | 1 ( 20.0)               |                |
| - 1                                   | 9 (75.0)                | 2 ( 40.0)               | 0.4            |
| - 2                                   | 2 (16.7)                | 2 ( 40.0)               |                |
| Prior docetaxel or cabazitaxel, N (%) | 11 (91.7)               | 5 (100.0)               | 1.0            |
