# Supplementary material for: Impact of mutations in homologous recombination repair genes on treatment outcomes for metastatic castration resistant prostate cancer
Source: PubMed Central journal article supplement (PMC7526881; doi:10.1371/journal.pone.0239686), 2020-09-30
Supplement: pone.0239686.s008.pdf [file pone.0239686.s008.pdf]

**S6 Table. Predicted probabilities of (A) PSA30 and (B) PSA50 adjusted for prior treatment with similar therapy.**

**(A) PSA30**

| <b>Treatment</b> | <b>Prior therapy</b> | <b>N</b> | <b>No HR</b> | <b>HR</b> |
|------------------|----------------------|----------|--------------|-----------|
| Abiraterone      | No                   | 42       | 73%          | 79%       |
|                  | Yes                  | 6        | 21%          | 27%       |
| Enzalutamide     | No                   | 25       | 89%          | 92%       |
|                  | Yes                  | 28       | 38%          | 45%       |
| Docetaxel        | No                   | 34       | 67%          | 72%       |
|                  | Yes                  | 2        | 88%          | N/A       |
| Cabazitaxel      | No                   | 1        | 69%          | N/A       |
|                  | Yes                  | 16       | 23%          | 37%       |

**(B) PSA50**

| <b>Treatment</b> | <b>Prior therapy</b> | <b>N</b> | <b>No HR</b> | <b>HR</b> |
|------------------|----------------------|----------|--------------|-----------|
| Abiraterone      | No                   | 42       | 54%          | 72%       |
|                  | Yes                  | 6        | 18%          | 31%       |
| Enzalutamide     | No                   | 25       | 86%          | 95%       |
|                  | Yes                  | 28       | 18%          | 40%       |
| Docetaxel        | No                   | 34       | 50%          | 62%       |
|                  | Yes                  | 2        | 85%          | N/A       |
| Cabazitaxel      | No                   | 1        | 3%           | N/A       |
|                  | Yes                  | 16       | 3%           | 34%       |
