# Supplementary material for: Impact of mutations in homologous recombination repair genes on treatment outcomes for metastatic castration resistant prostate cancer
Source: PubMed Central journal article supplement (PMC7526881; doi:10.1371/journal.pone.0239686), 2020-09-30
Supplement: pone.0239686.s009.pdf [file pone.0239686.s009.pdf]

**S7 Table. Best PSA response by treatment and HR status (BRCA2 or PALB2 vs no HR).**

| <b>Treatment</b> | <b>Response</b> | <b>No HR, N (%)</b> | <b>BRCA2 or PALB2, N (%)</b> | <b>P-value</b> |
|------------------|-----------------|---------------------|------------------------------|----------------|
| Abiraterone      | PSA30           | 19/29 (66%)         | 7/10 (70%)                   | 1.0            |
|                  | PSA50           | 14/29 (48%)         | 7/10 (70%)                   | 0.3            |
| Enzalutamide     | PSA30           | 17/29 (59%)         | 6/12 (50%)                   | 0.7            |
|                  | PSA50           | 13/29 (45%)         | 6/12 (50%)                   | 1.0            |
| Docetaxel        | PSA30           | 17/25 (68%)         | 6/8 (75%)                    | 1.0            |
|                  | PSA50           | 13/25 (52%)         | 5/8 (62%)                    | 0.7            |
| Cabazitaxel      | PSA30           | 3/12 (25%)          | 2/3 (67%)                    | 0.2            |
|                  | PSA50           | 0/12 ( 0%)          | 2/3 (67%)                    | 0.03           |
