# Supplementary material for: Impact of mutations in homologous recombination repair genes on treatment outcomes for metastatic castration resistant prostate cancer
Source: PubMed Central journal article supplement (PMC7526881; doi:10.1371/journal.pone.0239686), 2020-09-30
Supplement: pone.0239686.s010.pdf [file pone.0239686.s010.pdf]

**S8 Table. Median (A) PSA progression-free survival and (B) clinical or radiographic progression-free survival by treatment and HR status (BRCA2 or PALB2 vs no HR).**

**(A) PSA progression-free survival (pPFS)**

| <b>Treatment</b> | <b>HR Status</b> | <b>N</b> | <b>Median pPFS (95% CI)</b> | <b>P-value</b> |
|------------------|------------------|----------|-----------------------------|----------------|
| Abiraterone      | No HR            | 29       | 6.0 (5.4, 10.6)             | 0.3            |
|                  | BRCA2 or PALB2   | 10       | 5.1 (3.4, NA)               |                |
| Enzalutamide     | No HR            | 29       | 4.4 (3.0, 10.3)             | 0.2            |
|                  | BRCA2 or PALB2   | 12       | 9.1 (2.9, NA)               |                |
| Docetaxel        | No HR            | 25       | 5.1 (3.7, NA)               | 0.12           |
|                  | BRCA2 or PALB2   | 8        | 3.2 (2.8, NA)               |                |
| Cabazitaxel      | No HR            | 12       | 3.2 (2.8, NA)               | 0.6            |
|                  | BRCA2 or PALB2   | 3        | 4.9 (2.8, NA)               |                |

**(B) Clinical or radiographic progression-free survival (crPFS)**

| <b>Treatment</b> | <b>HR Status</b> | <b>N</b> | <b>Median crPFS (95% CI)</b> | <b>P-value</b> |
|------------------|------------------|----------|------------------------------|----------------|
| Abiraterone      | No HR            | 28       | 8.0 (5.8, 13.5)              | 0.5            |
|                  | BRCA2 or PALB2   | 10       | 9.1 (4.1, NA)                |                |
| Enzalutamide     | No HR            | 29       | 9.3 (6.4, 19.3)              | 0.7            |
|                  | BRCA2 or PALB2   | 12       | 10.7 (4.2, NA)               |                |
| Docetaxel        | No HR            | 25       | 5.7 (4.2, NA)                | 0.5            |
|                  | BRCA2 or PALB2   | 8        | NA (3.9, NA)                 |                |
| Cabazitaxel      | No HR            | 12       | 4.2 (2.8, NA)                | 0.3            |
|                  | BRCA2 or PALB2   | 3        | 8.9 (2.3, NA)                |                |
